# Supplementary material for: RT2 PCR array screening reveals distinct perturbations in DNA damage response signaling in FUS-associated motor neuron disease
Source: PubMed Central journal article supplement (PMC6894127; doi:10.1186/s13041-019-0526-4), 2019-12-04
Supplement: 13041_2019_526_MOESM1_ESM.pdf [file 13041_2019_526_MOESM1_ESM.pdf]

| RT <sup>2</sup> profiler whole gene list |       |        |        |        |          |
|------------------------------------------|-------|--------|--------|--------|----------|
| APEX1                                    | ERCC1 | MLH3   | OGG1   | RAD23B | TOP3A    |
| APEX2                                    | ERCC2 | MMS19  | PARP1  | RAD50  | TOP3B    |
| ATM                                      | ERCC3 | MPG    | PARP2  | RAD51  | TREX1    |
| ATR                                      | ERCC4 | MRE11A | PARP3  | RAD51B | UNG      |
| ATXN3                                    | ERCC5 | MSH2   | PMS1   | RAD51C | XAB2     |
| BRCA1                                    | ERCC6 | MSH3   | PMS2   | RAD51D | XPA      |
| BRCA2                                    | ERCC8 | MSH4   | PNKP   | RAD52  | XPC      |
| BRIP1                                    | EXO1  | MSH5   | POLB   | RAD54L | XRCC1    |
| CCNH                                     | FEN1  | MSH6   | POLD3  | RFC1   | XRCC2    |
| CCNO                                     | LIG1  | MUTYH  | POLL   | RPA1   | XRCC3    |
| CDK7                                     | LIG3  | NEIL1  | PRKDC  | RPA3   | XRCC4    |
| DDB1                                     | LIG4  | NEIL2  | RAD18  | SLK    | XRCC5    |
| DDB2                                     | MGMT  | NEIL3  | RAD21  | SMUG1  | XRCC6    |
| DMC1                                     | MLH1  | NTHL1  | RAD23A | TDG    | XRCC6BP1 |

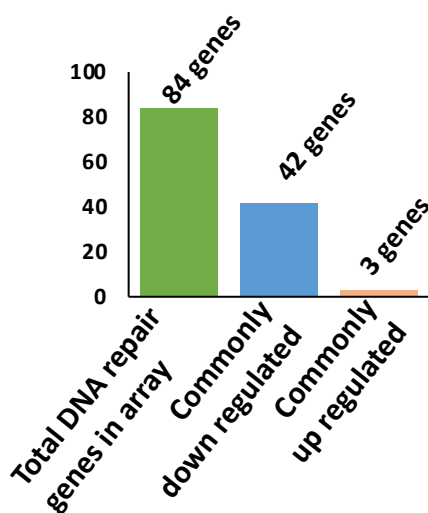

**Additional file: Table S1.** List of DNA repair genes screened by RT<sup>2</sup> profiler array in FUS knockout and knockdown cell. The histogram shows the number of total genes and genes that are consistently down regulated or up regulated in both FUS KO and KD cells.
