# Supplementary material for: RT2 PCR array screening reveals distinct perturbations in DNA damage response signaling in FUS-associated motor neuron disease
Source: PubMed Central journal article supplement (PMC6894127; doi:10.1186/s13041-019-0526-4), 2019-12-04
Supplement: 13041_2019_526_MOESM3_ESM.pdf [file 13041_2019_526_MOESM3_ESM.pdf]

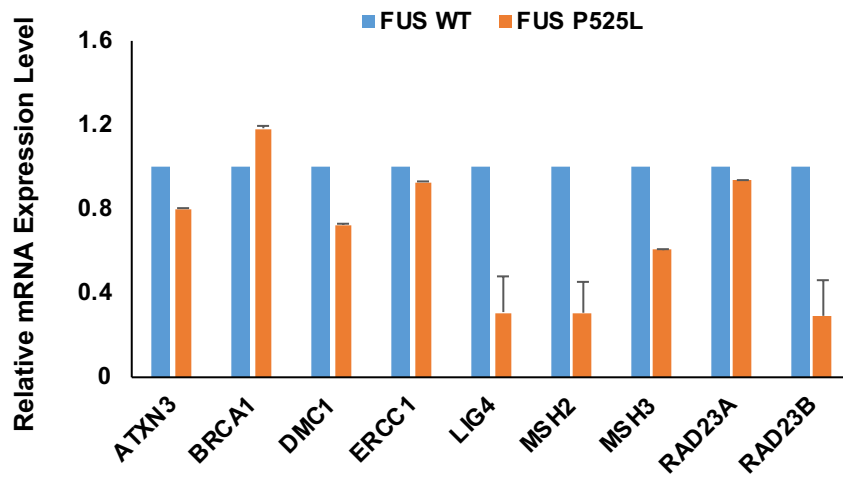

**Additional file: Figure S2.** Histogram showing the relative mRNA expression level of altered DNA repair genes in FUS WT and FUS P525L fibroblasts.
