# Supplementary material for: RT2 PCR array screening reveals distinct perturbations in DNA damage response signaling in FUS-associated motor neuron disease
Source: Mol Brain. 2019 Dec 4;12:103. doi: 10.1186/s13041-019-0526-4 (PMC6894127; doi:10.1186/s13041-019-0526-4)
Supplement: Supplementary file 5 — Additional file 5: Figure S4. Gene-gene functional interaction network prediction using GeneMANIA pathway analysis software. [file 13041_2019_526_MOESM5_ESM.pdf]

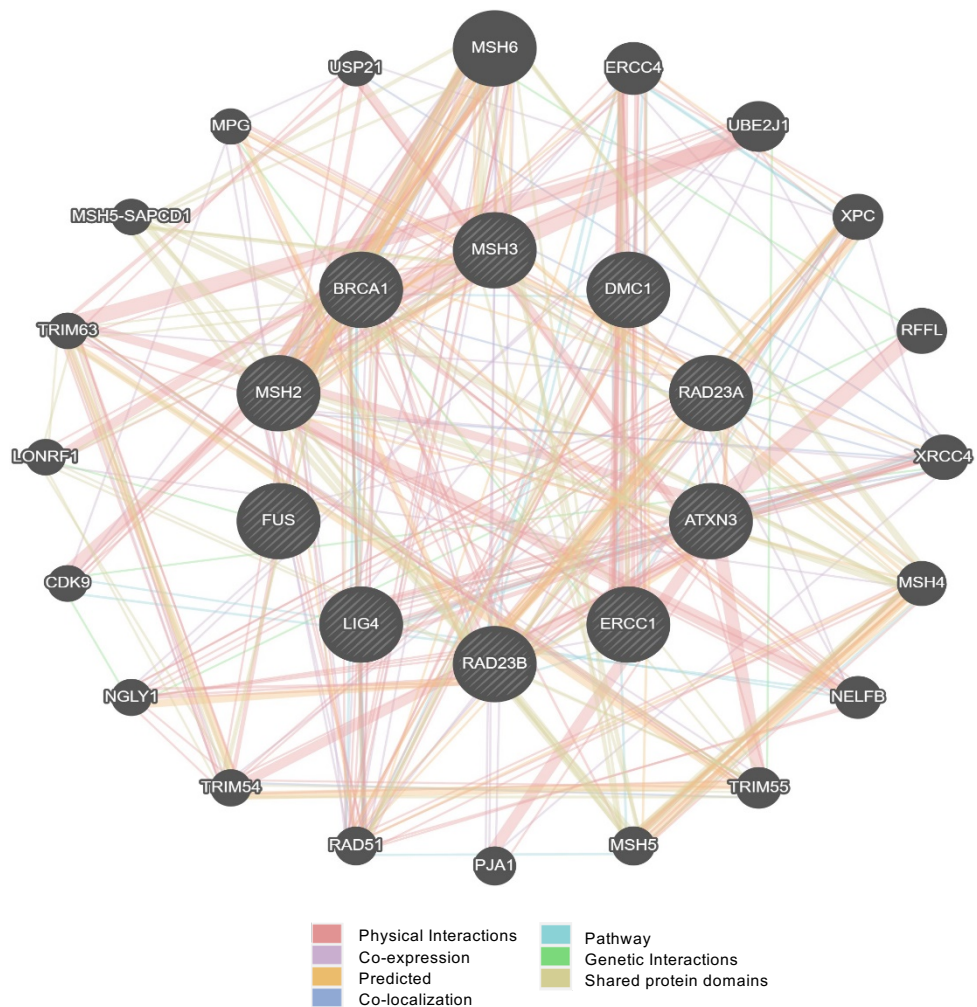

**Additional file: Figure S4.** Gene-gene functional interaction network prediction using GeneMANIA pathway analysis software.
